# Supplementary material for: Tritium activity concentration and behaviour in coastalregions of Fukushima in 2014
Source: Copernicus journal article supplement (doi:10.5194/bg-2021-10), 2021-02-23
Supplement: Supplementary file [file bg-2021-10-AC3-supplement.pdf]

**Additional reply to Comment on bg-2021-10 by anonymous referee #1**

**Dear anonymous referee #1,**

**We already submitted our replies to your comments on 27 August 2021. Today, we add a few regarding the tritium activity concentration in monthly precipitation at Tamura, Fukushima in 201-2014 as blow.**

**Best regards,**

**Michio**

\*\*\*\*\*

L266 “Tamura-shi”

Same as above comment

Reply: We put a mark on Tamura-shi in the revised figure 1. And the exact location of the sampling site is shown in "Tritium concentration in precipitation at Tamura City, Fukushima in 2013-2014, Tagomori et al., doi: 10.34355/KEEA.00086." which is published on 3 September 2021.

L416 “References”

Reply: As you pointed out, Tagomori et al., 2015 is written in Japanese. But this article is important for the discussion in section 4.2, therefore the authors asked Mr. Tagomori to publish the data in the document as a dataset with EN abstract with DOI. And the 3H activity concentration dataset at Tamura, Fukushima in 2013-2014 was published as "Tritium concentration in precipitation at Tamura City, Fukushima in 2013-2014, Tagomori et al., doi: 10.34355/KEEA.00086." So everybody can cite this.

End of additional reply to RC1.
